# Supplementary material
Source: ML conference proceedings conference paper supplement (https://openaccess.thecvf.com/content/ACCV2020/html/Marcu_Semantics_through_Time_ACCV_2020_paper.html)
Supplement: Supplementary file 1 [file Marcu_Semantics_through_Time_ACCV_2020_supplemental.zip]

Archive with 3 entries (3 files):
- TEST_unseen_videos.mp4
- TRAIN_segprop_vs_prediction.mp4
- 0826-supp.pdf
